# Supplementary material for: Distinct Patterns of Emergence of SARS-CoV-2 Spike Variants including N501Y in Clinical Samples in Columbus Ohio
Source: bioRxiv or medRxiv preprint supplement (doi:10.1101/2021.01.12.426407), 2021-01-26
Supplement: Supplementary file [file media-1.pdf]

**Supplementary Table 1. Defining variants characteristics of SARS-CoV-2 clades, based on NextStrain terminology.**

| Gene                         | Nucleotide     | Amino Acid | COH32* | B.1.1.7** | SA# |
|------------------------------|----------------|------------|--------|-----------|-----|
| <b>G strain</b>              |                |            |        |           |     |
| S                            | A23403G        | D614G      | +      | +         | +   |
| Upstream                     | C241T          | NA         | +      | +         | +   |
| ORF1ab                       | C3037T         | F924F      | +      | +         | +   |
|                              | C14408T        | L4715L     | +      | +         | +   |
| <b>Clade 20B</b>             |                |            |        |           |     |
| N                            | 28881 GGG->AAC | RG203KR    | -      | +         | -   |
| <b>B.1.1.7 (20I/501Y.V1)</b> |                |            |        |           |     |
| S                            | A23063T        | N501Y      | +      | +         | +   |
|                              | 21765-21770del | HV69-70del | -      | +         | -   |
|                              | 21991-21993del | Y144del    | -      | +         | -   |
|                              | C23271A        | A570D      | -      | +         | -   |
|                              | C23604A        | P681H      | -      | +         | -   |
|                              | C23709T        | T716I      | -      | +         | -   |
|                              | T24506G        | S982A      | -      | +         | -   |
| ORF8                         | G28048T        | R52I       | +      | +         | -   |
|                              | C27972T        | Q27*       | -      | +         | -   |
|                              | A28111G        | Y37C       | -      | +         | -   |
| N                            | 28280 GAT->CTA | D3L        | -      | +         | -   |
|                              | C28977T        | S235F      | -      | +         | -   |
| <b>Clade 20C</b>             |                |            |        |           |     |
| ORF1ab                       | C1059T         | T265I      | +      | -         | +   |
| ORF3a                        | G25563T        | Q57H       | +      | -         | +   |
| <b>Clade 20G</b>             |                |            |        |           |     |
| ORF3a                        | G25907T        | G172V      | +      | -         | -   |
| ORF8                         | C27964T        | S24L       | +      | -         | -   |
| N                            | C28472T        | P67S       | +      | -         | -   |
|                              | C28869T        | P199L      | +      | -         | -   |

\*COH.20G/501Y, \*\*20I/501Y.V1, #20H/501Y.V2
