# Supplementary material for: Distinct Patterns of Emergence of SARS-CoV-2 Spike Variants including N501Y in Clinical Samples in Columbus Ohio
Source: bioRxiv or medRxiv preprint supplement (doi:10.1101/2021.01.12.426407), 2021-01-26
Supplement: Supplementary file [file media-1.pdf]

Supplementary Figure 1

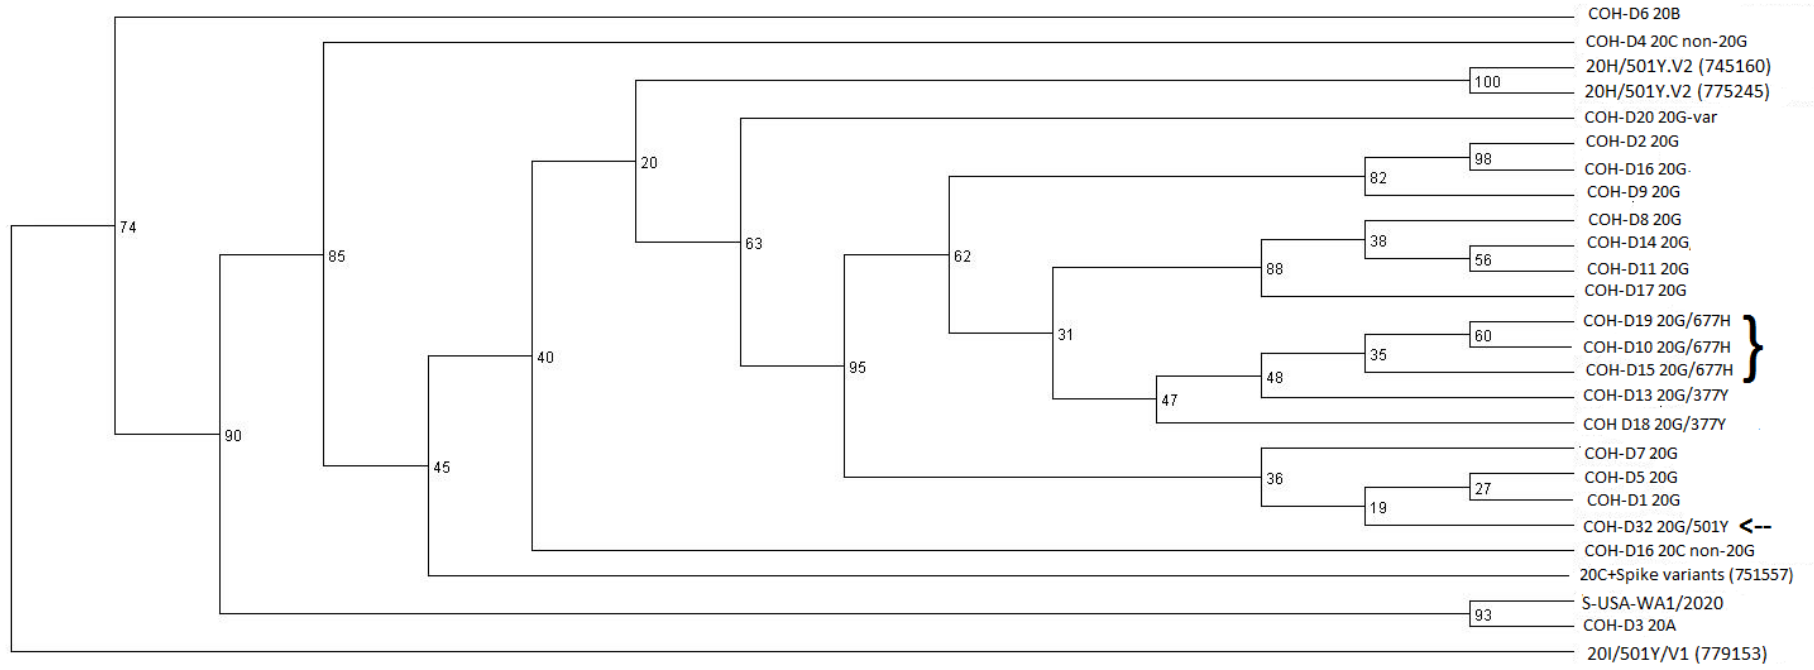

**Supplementary Figure 1. Phylogenic relationship between viruses seen in late December in Columbus Ohio.** Samples labeled “COH” are nasopharyngeal swabs from patients tested in Columbus, Ohio from 12/21-12/31/20. Most are clade 20G, with one each being 20A, 20B, and a 20G variant (var) that does not show every strain-defining mutation. One of the 20G/501Y viruses is included and marked with an arrow. Three examples of the emerging 20G/677H variant are bracketed, with the adjacent 20G/377Y viruses containing N D377Y but not S Q677H or M A85S. Reference sequences (FASTA files downloaded from GISAID.org) show recent examples of South Africa B.1.351/20H/501Y.V2 (EPI\_ISL\_745160, 12/4/2020), a B.1.351 20H/501Y.V2 strain collected in Australia (EPI\_ISL\_775245, 1/4/2021), a B.1.1.7/20I/501Y.V1 virus collected in the United States (EPI\_ISL\_779154, 1/4/2021) and a 20C-derived virus from Nevada with several distinct S variants (EPI\_ISL\_751557, 12/4/2020). The 2019-nCoV/USA-WA1/2020 SARS-CoV-2 reference strain (ATCC) was used as a sequencing control. See Methods for details on tree-building and interpretation.
