# Supplementary material for: Distinct Patterns of Emergence of SARS-CoV-2 Spike Variants including N501Y in Clinical Samples in Columbus Ohio
Source: bioRxiv or medRxiv preprint supplement (doi:10.1101/2021.01.12.426407), 2021-01-26
Supplement: Supplementary file [file media-3.pdf]

Supplementary Figure 3

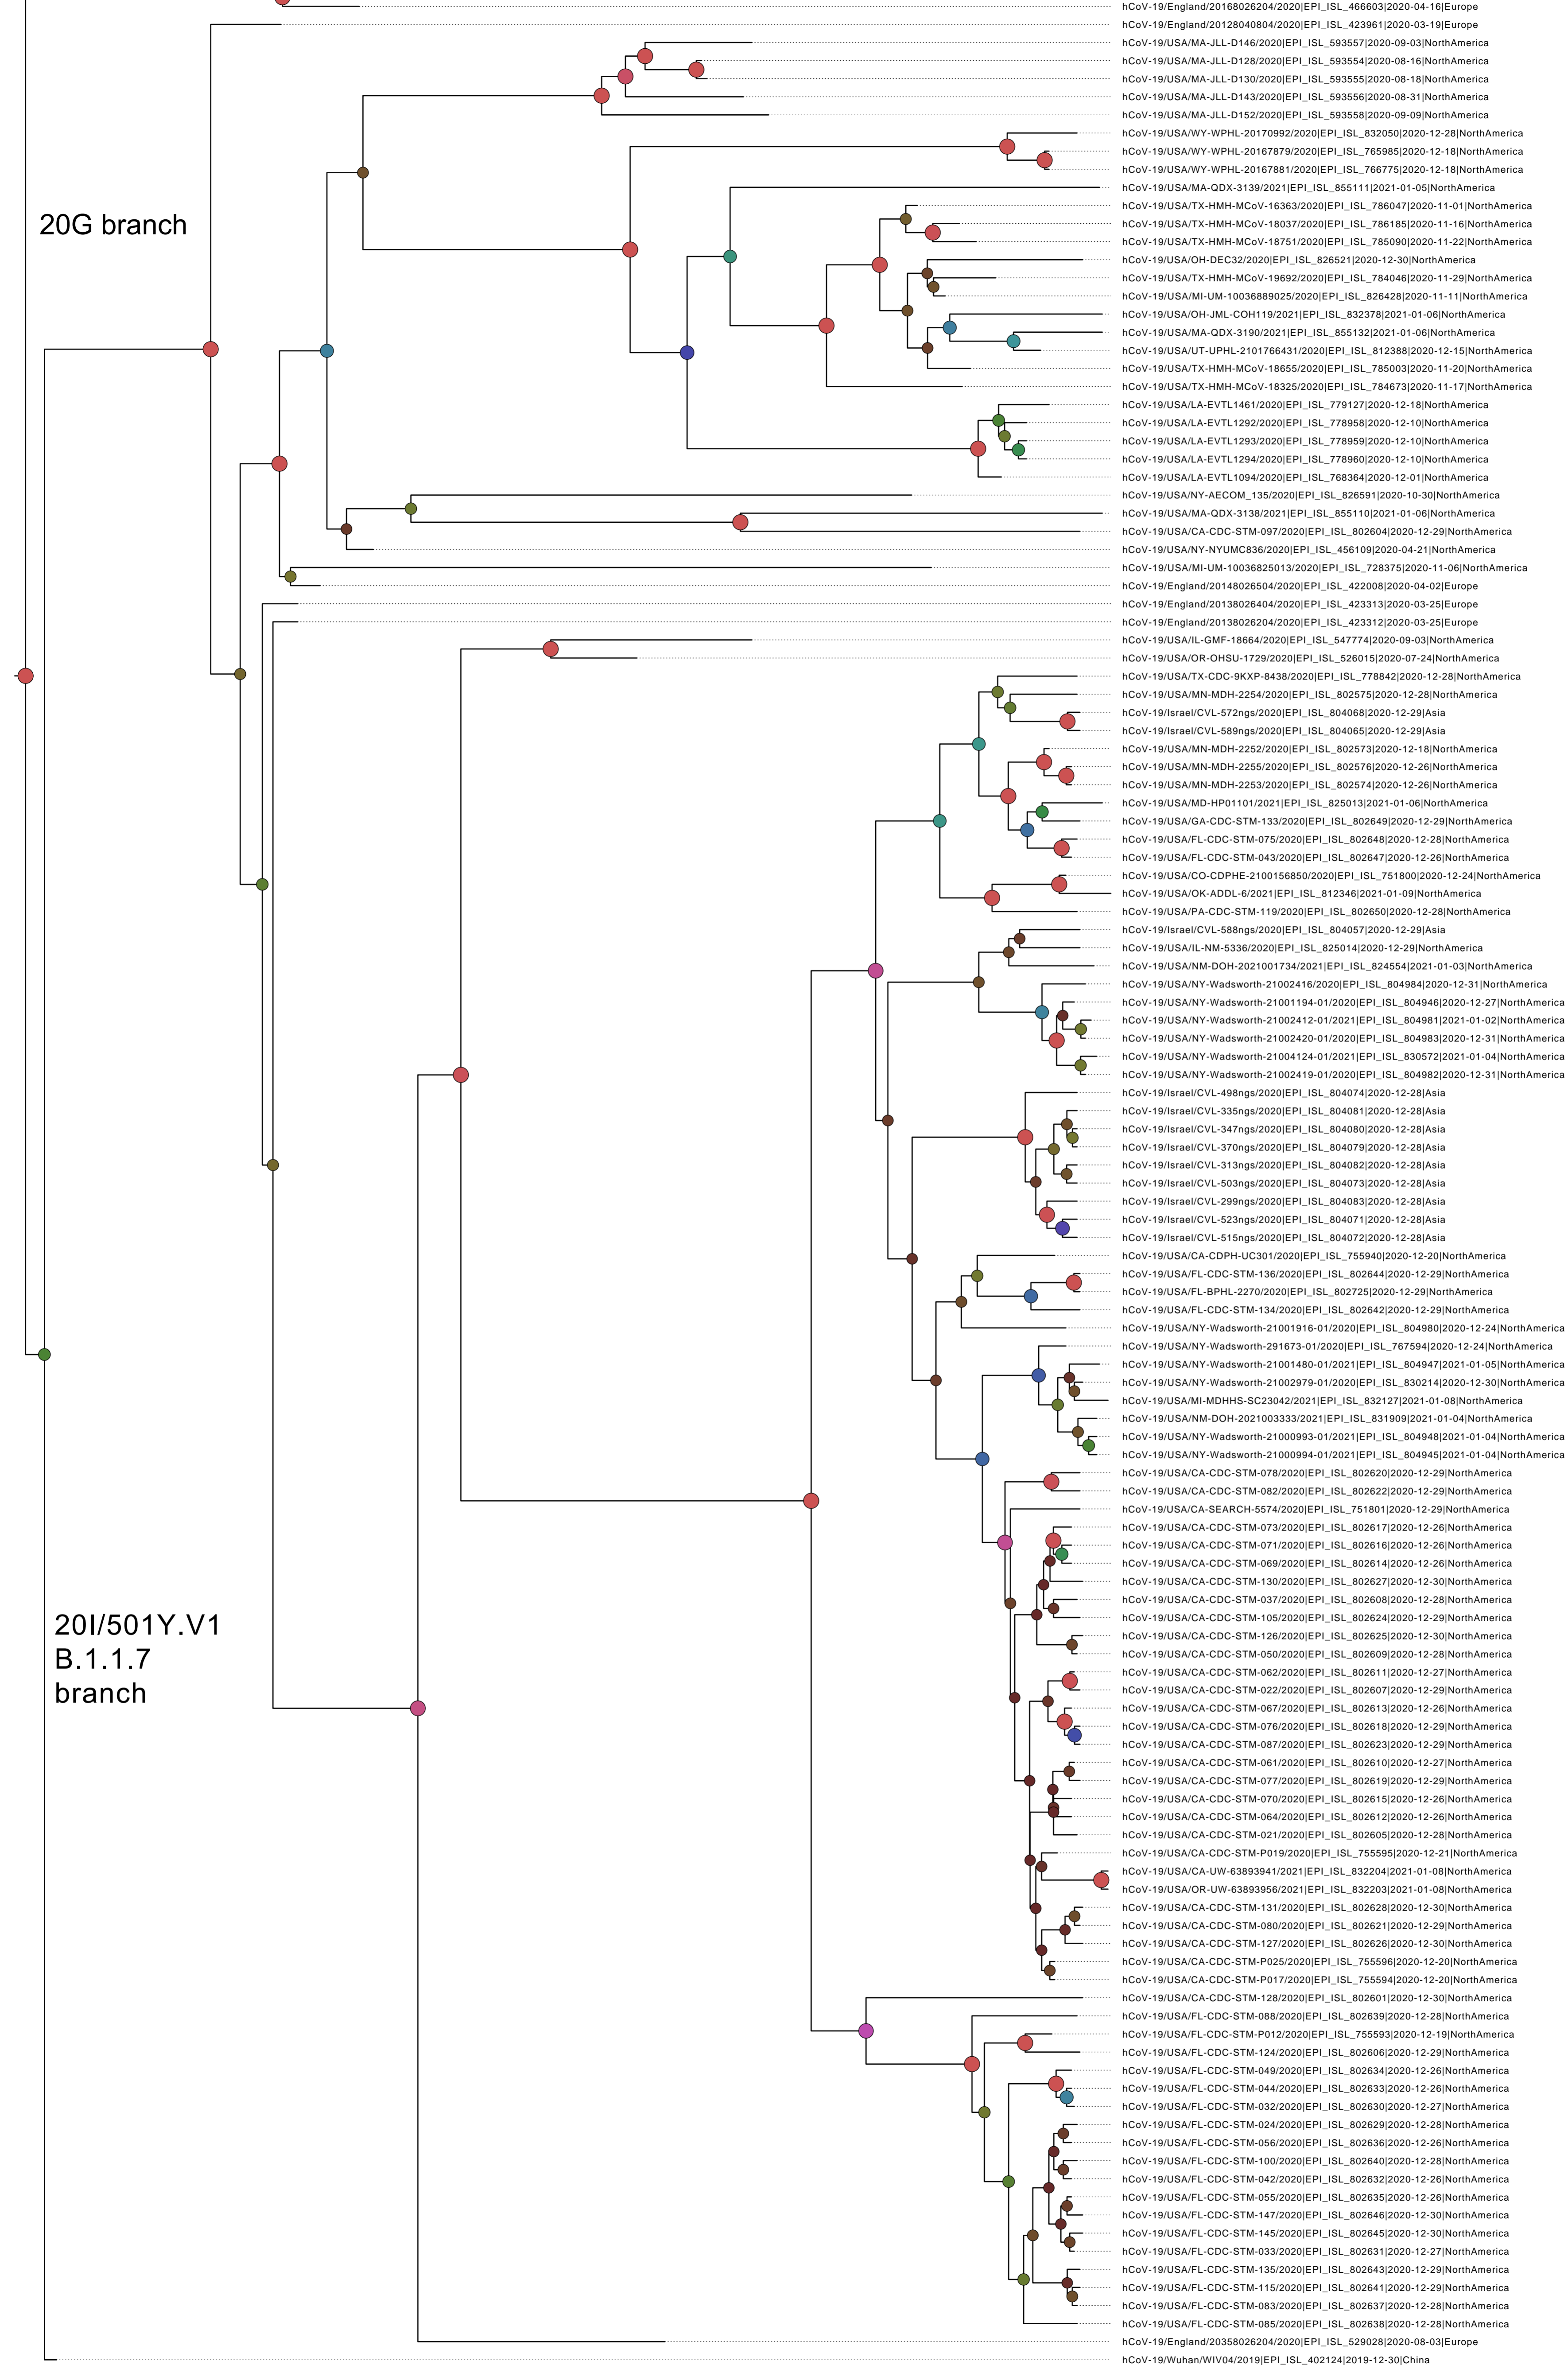

**Supplementary Figure 3. Extended analysis of SARS-CoV-2 viruses containing S N501Y in the United States as of January 23, 2021.** The top branches are 20G clade viruses, whereas the bottom branches are B.1.1.7/20I/501Y.V1 strain. Red ink highlights the 20G/501Y viruses from Columbus, Ohio. See Methods for details on tree-building and interpretation. Sequences representing the Wuhan L-strain (EPI\_ISL\_402124), G-strain clades O (EPI\_ISL\_466603), V (EPI\_ISL\_423311), G (EPI\_ISL\_423961, EPI\_ISL\_529028, EPI\_ISL\_423312 and EPI\_ISL\_423313), GV (EPI\_ISL\_649919) and GH (EPI\_ISL\_422008 and EPI\_ISL\_728375) from the US that all do not contain N501Y are included for reference.
